# Supplementary material for: Artificial Neural Networks for a Semantic Map of Variables in a Music Listening-Based Study
Source: MDPI journal article supplement (doi:10.3390/app132111811), 2023-10-29
Supplement: s1 [file s1]

Archive with 1 entries (1 files):
- applsci-2385004-supplementary.pdf
