# Supplementary material for: Artificial Neural Networks for a Semantic Map of Variables in a Music Listening-Based Study
Source: MDPI journal article supplement (doi:10.3390/app132111811), 2023-10-29

Supplementary Materials

Additional Figures from Auto-CM analysis.

**Figure S1.** Semantic connectivity map with link strengths in the Melomics-Health Group.

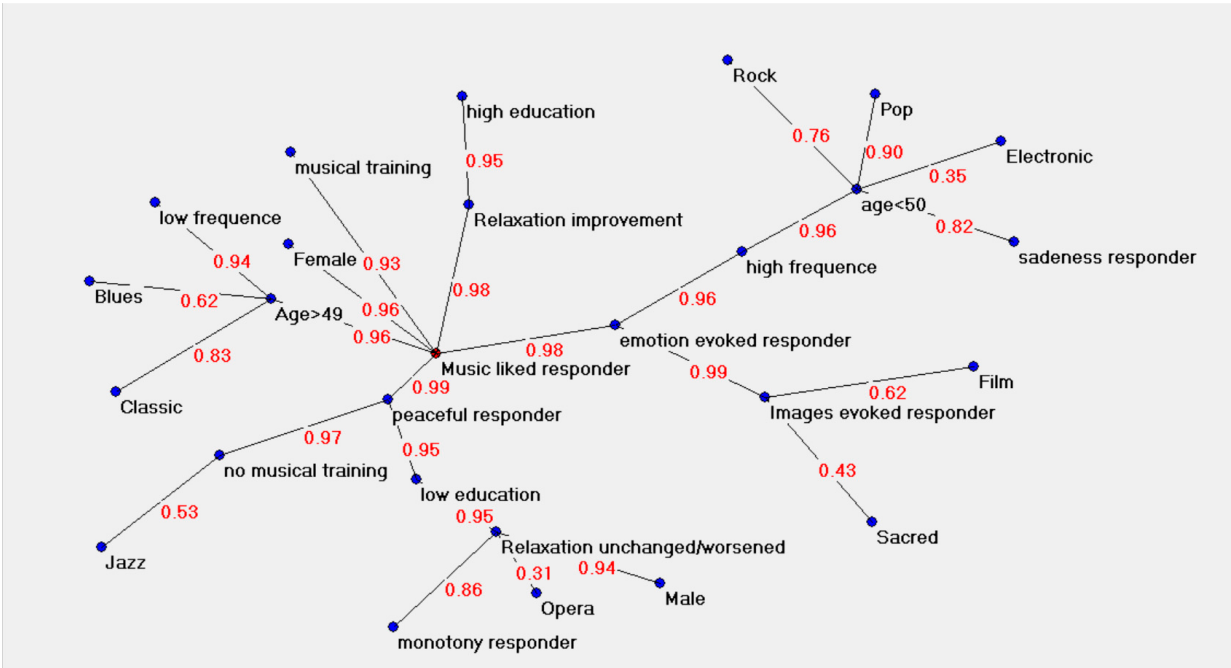

**Figure S2.** Semantic connectivity map with link strengths in the Conventional Self-Selected Music Group.

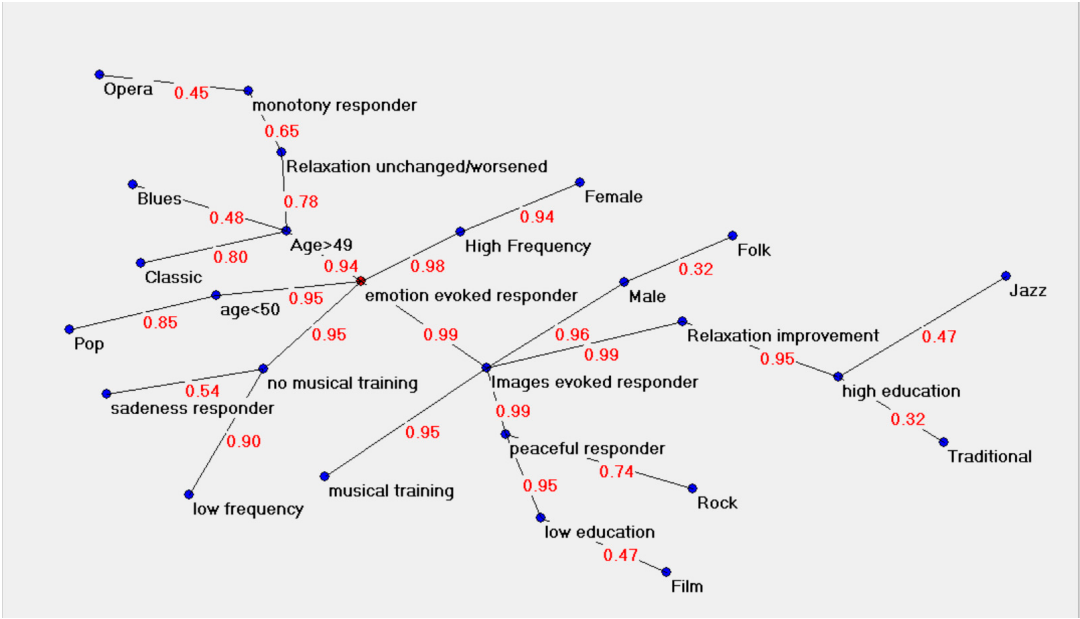

**Figure S3.** Semantic connectivity map with Minimum Spanning Tree and Maximal Regular Graph (Melomics-Health Group). The map indicates the most important connections in the dataset, and the resulting “diamond” expresses the complexity core.

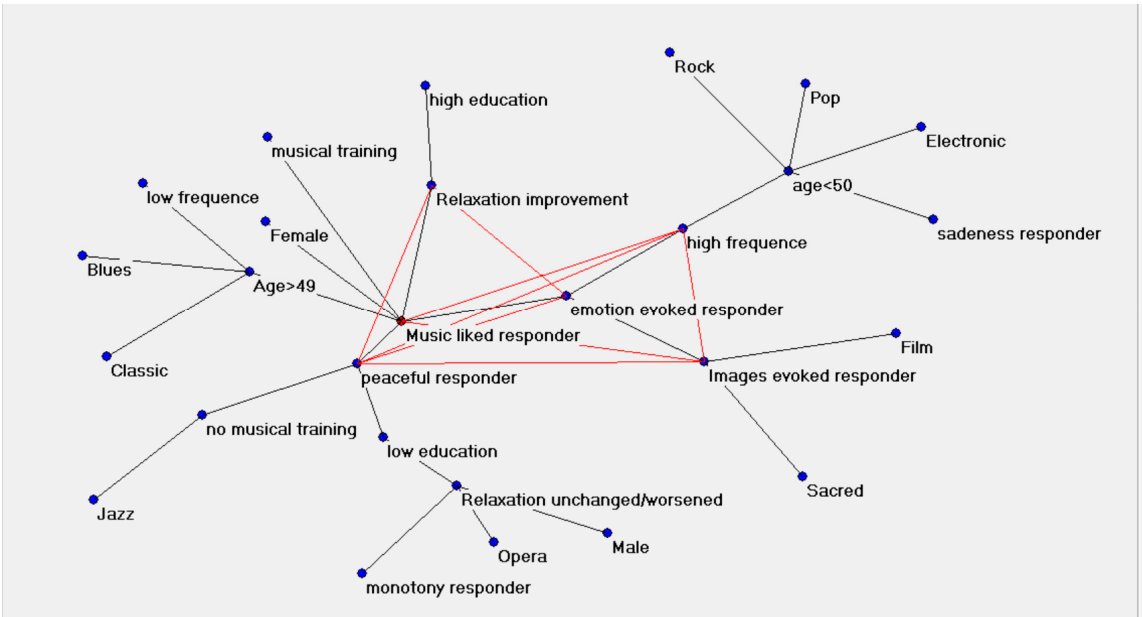

**Figure S4.** Semantic connectivity map with Minimum Spanning Tree and Maximal Regular Graph (Conventional Self-Selected Music Group). The map indicates the most important connections in the dataset, and the resulting “diamond” expresses the complexity core.

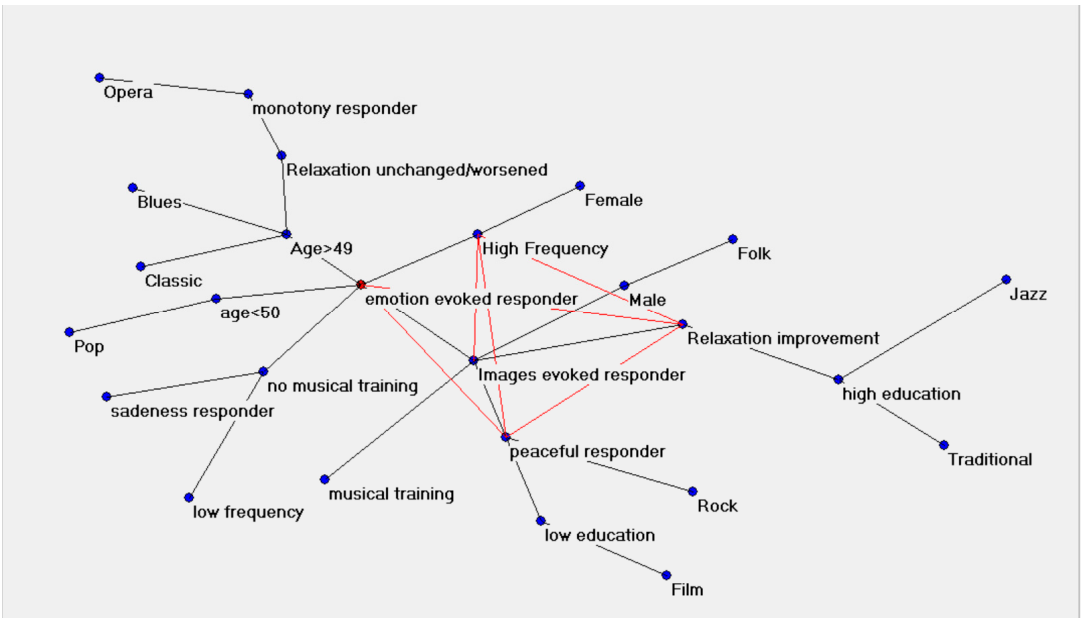

Supplement: s1 [file s1 › applsci-2385004-supplementary.pdf]
